# Supplementary material for: High-Dispersed V2O5-CuOX Nanoparticles on h-BN in NH3-SCR and NH3-SCO Performance
Source: MDPI journal article supplement (doi:10.3390/nano12142329), 2022-07-06
Supplement: s1 [file s1]

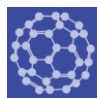

Supporting Information

# High-Dispersed $V_2O_5$ - $CuO_x$ Nanoparticles on h-BN in $NH_3$ -SCR and $NH_3$ -SCO Performance

Han-Gyu Im <sup>1,2</sup>, Myeung-Jin Lee <sup>1</sup>, Woon-Gi Kim <sup>1,2</sup>, Su-Jin Kim <sup>1</sup>, Bora Jeong <sup>1</sup>, Bora Ye <sup>1</sup>, Heesoo Lee <sup>2,\*</sup> and Hong-Dae Kim <sup>1,\*</sup>

<sup>1</sup> Industrial Environment Green Deal Agency, Korea Institute of Industrial Technology, Ulsan 44413, Korea; hangyu@kitech.re.kr (H.-G.I.); leemj@kitech.re.kr (M.-J.L.); woongi25@kitech.re.kr (W.-G.K.); sujini@kitech.re.kr (S.-J.K.); bora1106@kitech.re.kr (B.J.); yebora@kitech.re.kr (B.Y.)

<sup>2</sup> Department of Materials Science & Engineering, Pusan National University, Pusan 46241, Korea

\* Correspondence: heesoo@pusan.ac.kr (H.L.); hdkim@kitech.re.kr (H.-D.K.); Tel.: +82-51-510-3225 (H.L.); +82-52-980-6650 (H.-D.K.); Fax: +82-52-980-6669 (H.-D.K.)

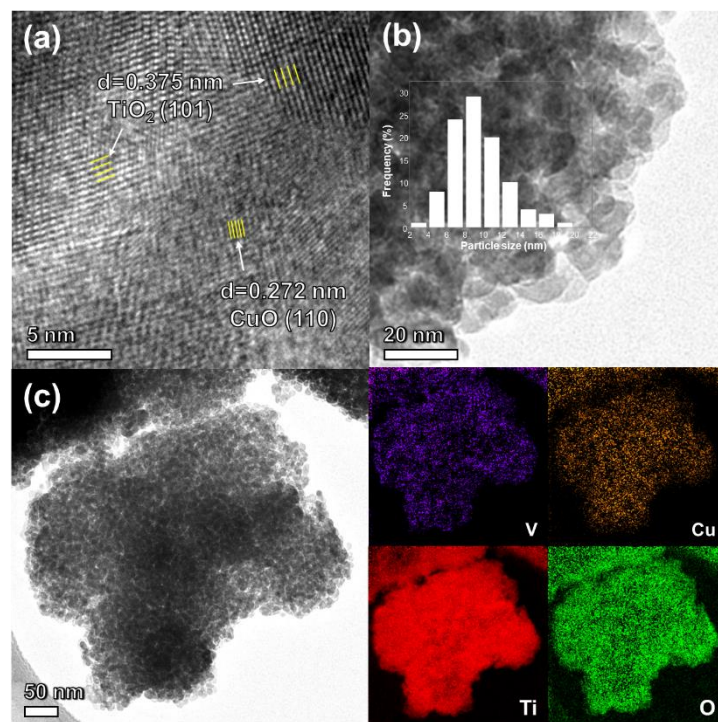

**Figure S1.** (a) High magnification TEM image, (b) TEM image and histogram of particle size distribution, (c) EDS mapping for V-Cu/Ti.

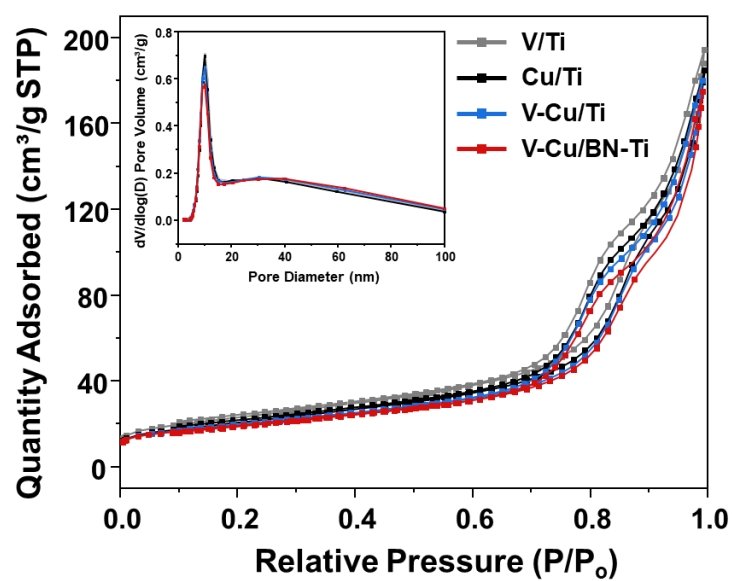

**Figure S2.** N<sub>2</sub> absorption-desorption isotherms and pore size distribution calculated by BJH method of synthesized catalysts.

**Table S1.** Specific surface areas, pore volumes and pore diameters of synthesized catalysts.

| Catalysts  | BET specific surface area<br>(m <sub>2</sub> g <sup>-1</sup> ) | Total pore volume<br>(mL g <sup>-1</sup> ) | Average pore diameter<br>(nm) |
|------------|----------------------------------------------------------------|--------------------------------------------|-------------------------------|
| V/Ti       | 82.19                                                          | 0.29                                       | 14.79                         |
| Cu/Ti      | 74.32                                                          | 0.28                                       | 15.00                         |
| V-Cu/Ti    | 68.81                                                          | 0.28                                       | 15.06                         |
| V-Cu/BN-Ti | 67.29                                                          | 0.27                                       | 15.45                         |
